# Supplementary material for: Transcriptome analysis reveals potential function of long non-coding RNAs in 20-hydroxyecdysone regulated autophagy in Bombyx mori
Source: BMC Genomics. 2021 May 22;22:374. doi: 10.1186/s12864-021-07692-1 (PMC8140452; doi:10.1186/s12864-021-07692-1)
Supplement: Supplementary file 10 — Additional file 10. The top 20 enriched KEGG pathways of differentially expressed mRNAs in the two groups. [file 12864_2021_7692_MOESM10_ESM.xlsx]

## Sheet: T_2h_vs_C_2h_Top20_All
pathway_term (T_2h_vs_C_2h_Top20_All)	rich_factor	qvalue	gene_number
Citrate cycle (TCA cycle)	0.526316	0.0897111	20
Biosynthesis of amino acids	0.371795	0.26167	29
Fatty acid metabolism	0.392857	0.280227	22
Carbon metabolism	0.333333	0.280227	33
ECM-receptor interaction	0.464286	0.307289	13
2-Oxocarboxylic acid metabolism	0.478261	0.360518	11
Cysteine and methionine metabolism	0.413793	0.493489	12
Peroxisome	0.30303	0.493489	30
Glycosaminoglycan degradation	0.421053	0.772531	8
Tyrosine metabolism	0.4375	0.772531	7
Hippo signaling pathway - fly	0.309091	0.772531	17
Amino sugar and nucleotide sugar metabolism	0.307692	0.772531	16
Tryptophan metabolism	0.36	0.772531	9
Metabolic pathways	0.221739	0.772531	204
Propanoate metabolism	0.428571	0.772531	6
Glutathione metabolism	0.302326	0.863906	13
Phenylalanine metabolism	0.416667	0.863906	5
Arginine and proline metabolism	0.288889	0.863906	13
Glycosphingolipid biosynthesis - globo series	0.384615	0.863906	5
Glyoxylate and dicarboxylate metabolism	0.30303	0.863906	10

## Sheet: T_2h_vs_C_2h_Top20_Down
pathway_term (T_2h_vs_C_2h_Top20_Down)	rich_factor	qvalue	gene_number
Fatty acid metabolism	0.303571	0.05809	17
Citrate cycle (TCA cycle)	0.342105	0.05809	13
Tryptophan metabolism	0.36	0.166231	9
Glyoxylate and dicarboxylate metabolism	0.272727	0.51548	9
Propanoate metabolism	0.357143	0.519364	5
Lysine degradation	0.25	0.519364	8
Carbon metabolism	0.181818	0.519364	18
Biosynthesis of amino acids	0.192308	0.519364	15
Circadian rhythm - fly	0.428571	0.772575	3
Jak-STAT signaling pathway	0.263158	0.841517	5
ECM-receptor interaction	0.214286	0.981099	6
Terpenoid backbone biosynthesis	0.217391	0.981099	5
2-Oxocarboxylic acid metabolism	0.217391	0.981099	5
Phagosome	0.162162	0.981099	12
Pyruvate metabolism	0.184211	0.981099	7
Glycosphingolipid biosynthesis - ganglio series	0.272727	0.981099	3
Phenylalanine metabolism	0.25	0.999999	3
Glycosaminoglycan degradation	0.210526	0.999999	4
Pantothenate and CoA biosynthesis	0.230769	0.999999	3
Glycine, serine and threonine metabolism	0.152542	0.999999	9

## Sheet: T_2h_vs_C_2h_Top20_Up
pathway_term (T_2h_vs_C_2h_Top20_Up)	rich_factor	qvalue	gene_number
Glutathione metabolism	0.255814	0.354272	11
Peroxisome	0.181818	0.354272	18
Amino sugar and nucleotide sugar metabolism	0.211538	0.354272	11
Biosynthesis of amino acids	0.179487	0.354272	14
ECM-receptor interaction	0.25	0.354272	7
Tyrosine metabolism	0.3125	0.354272	5
Cysteine and methionine metabolism	0.241379	0.354272	7
2-Oxocarboxylic acid metabolism	0.26087	0.354272	6
Alanine, aspartate and glutamate metabolism	0.205882	0.451498	7
Carbon metabolism	0.151515	0.451498	15
Pentose phosphate pathway	0.25	0.451498	5
Arginine and proline metabolism	0.177778	0.490018	8
Lysosome	0.149425	0.490018	13
Citrate cycle (TCA cycle)	0.184211	0.490018	7
ABC transporters	0.217391	0.490018	5
Hippo signaling pathway - fly	0.163636	0.490018	9
Metabolic pathways	0.103261	0.629024	95
Glycosaminoglycan degradation	0.210526	0.633216	4
Notch signaling pathway	0.2	0.661825	4
Glycosphingolipid biosynthesis - globo series	0.230769	0.661825	3

## Sheet: T_6h_vs_C_6h_Top20_All
pathway_term (T_6h_vs_C_6h_Top20_All)	rich_factor	qvalue	gene_number
Proteasome	0.684211	0.00184736	26
Citrate cycle (TCA cycle)	0.605263	0.0109019	23
Fatty acid metabolism	0.5	0.017352	28
Amino sugar and nucleotide sugar metabolism	0.461538	0.0736942	24
2-Oxocarboxylic acid metabolism	0.608696	0.0736942	14
Ribosome biogenesis in eukaryotes	0.402985	0.120662	27
Biosynthesis of amino acids	0.371795	0.185162	29
Fatty acid degradation	0.4375	0.373269	14
Carbon metabolism	0.323232	0.450006	32
Phagosome	0.337838	0.464311	25
Purine metabolism	0.297101	0.522878	41
Alanine, aspartate and glutamate metabolism	0.382353	0.609716	13
Lysosome	0.298851	0.779901	26
Galactose metabolism	0.366667	0.779901	11
Glycosphingolipid biosynthesis - globo series	0.461538	0.779901	6
Metabolic pathways	0.238043	0.779901	219
Glycolysis / Gluconeogenesis	0.333333	0.779901	13
Propanoate metabolism	0.428571	0.779901	6
Lysine degradation	0.34375	0.779901	11
Cysteine and methionine metabolism	0.344828	0.779901	10

## Sheet: T_6h_vs_C_6h_Top20_Down
pathway_term (T_6h_vs_C_6h_Top20_Down)	rich_factor	qvalue	gene_number
Citrate cycle (TCA cycle)	0.526316	0.000179048	20
Ribosome biogenesis in eukaryotes	0.38806	0.000246061	26
Fatty acid biosynthesis	1	0.00056532	10
Fatty acid metabolism	0.321429	0.02265	18
2-Oxocarboxylic acid metabolism	0.434783	0.0446131	10
Phagosome	0.27027	0.0465856	20
Carbon metabolism	0.242424	0.0535731	24
Amino sugar and nucleotide sugar metabolism	0.288462	0.0692626	15
Aminoacyl-tRNA biosynthesis	0.261905	0.294011	11
Biosynthesis of amino acids	0.217949	0.294011	17
Fatty acid degradation	0.28125	0.294011	9
Glycolysis / Gluconeogenesis	0.25641	0.32797	10
Phototransduction - fly	0.275862	0.353983	8
Propanoate metabolism	0.357143	0.36677	5
Tryptophan metabolism	0.28	0.379861	7
Starch and sucrose metabolism	0.22449	0.386162	11
Lysine degradation	0.25	0.386162	8
Pyruvate metabolism	0.236842	0.386162	9
RNA polymerase	0.259259	0.386162	7
Arginine and proline metabolism	0.222222	0.386162	10

## Sheet: T_6h_vs_C_6h_Top20_Up
pathway_term (T_6h_vs_C_6h_Top20_Up)	rich_factor	qvalue	gene_number
Proteasome	0.684211	2.83791e-10	26
Lysosome	0.241379	0.0138574	21
Peroxisome	0.171717	0.657353	17
ECM-receptor interaction	0.25	0.667184	7
Fatty acid metabolism	0.178571	0.71914	10
Regulation of autophagy	0.25	0.71914	5
Glutathione metabolism	0.186047	0.71914	8
Glycine, serine and threonine metabolism	0.169492	0.71914	10
Nitrogen metabolism	0.266667	0.71914	4
Amino sugar and nucleotide sugar metabolism	0.173077	0.71914	9
Biosynthesis of amino acids	0.153846	0.71914	12
alpha-Linolenic acid metabolism	0.217391	0.71914	5
Nicotinate and nicotinamide metabolism	0.235294	0.729829	4
Biosynthesis of unsaturated fatty acids	0.1875	0.729829	6
Purine metabolism	0.130435	0.770719	18
Alanine, aspartate and glutamate metabolism	0.176471	0.770719	6
Other glycan degradation	0.178571	0.799243	5
One carbon pool by folate	0.230769	0.799243	3
Glycosphingolipid biosynthesis - globo series	0.230769	0.799243	3
Valine, leucine and isoleucine biosynthesis	0.285714	0.839297	2
